# Supplementary material for: Flux method growth of bulk MoS2single crystals and their application as a saturable absorber
Source: Royal Society of Chemistry journal article supplement (doi:10.1039/c5ce00484e), 2015-01-01
Supplement: c5ce00484e1.pdf [file c5ce00484e1.pdf]

## Supporting information for:

# Flux method growth of bulk MoS<sub>2</sub> single crystals and application as a saturable absorber

*Xixia zhang,<sup>1</sup> Fei Lou,<sup>1</sup> Chunlong Li,<sup>1</sup> Xiang Zhang,<sup>1</sup> Ning Jia,<sup>1</sup> Tongtong Yu,<sup>1</sup> Jingliang He,<sup>1,2</sup> Baitao Zhang,<sup>1,2</sup> Haibing Xia,<sup>1,2</sup> Shanpeng Wang,<sup>1,2\*</sup> and Xutang Tao<sup>1,2\*</sup>*

<sup>1</sup>State Key Laboratory of Crystal Materials, Shandong University, Jinan, 250100, China

<sup>2</sup>Key Laboratory of Functional Crystal Materials and Device (Shandong University, Ministry of Education), Jinan, 250100, China

### Corresponding Author

Xutang Tao: [txt@sdu.edu.cn](mailto:txt@sdu.edu.cn); Shanpeng Wang: [wshp@sdu.edu.cn](mailto:wshp@sdu.edu.cn).

### The captions for the supporting information:

Figure S1 the crystal grown at the ratio of starting materials;

Figure S2 the EDS images of MoS<sub>2</sub> crystal;

Figure S3 (a) the photos of ultrathin MoS<sub>2</sub> exfoliated by the liquid-phase exfoliation method in ethyl alcohol, (b) the supernatant of the centrifuge tube in (a) after centrifugation.

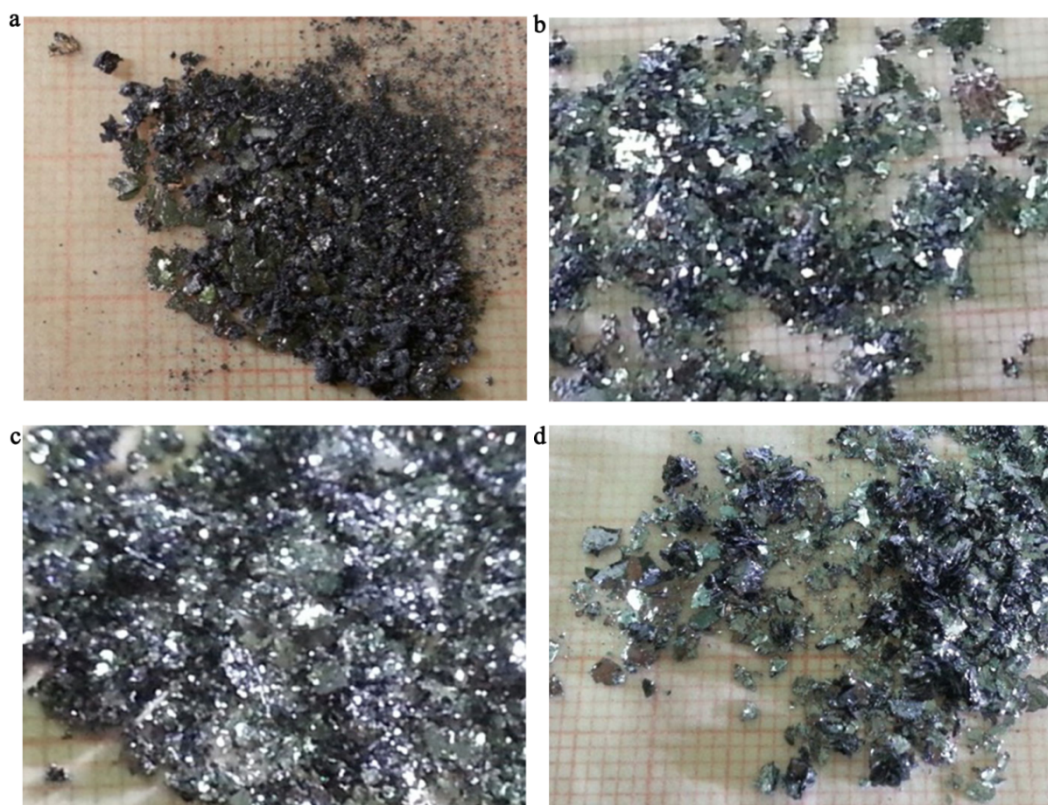

Fi

Figure S1 the crystal grown at the ratio of starting materials (a) Mo:S:Sn=1:2:5, (b) Mo:S:Sn=1:2:10, (c) Mo:S:Sn=1:2:15, (d) Mo:S:Sn=1:2:20

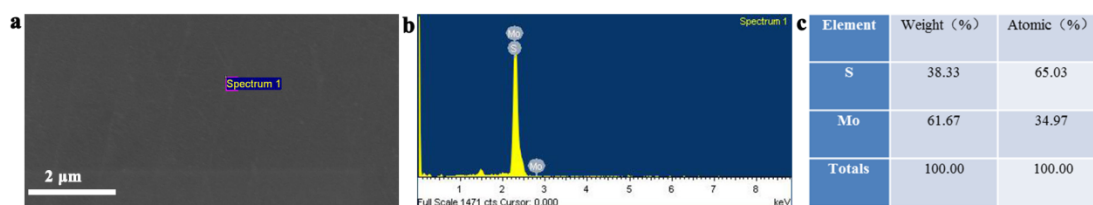

Figure S2 the EDS images of MoS<sub>2</sub> crystal

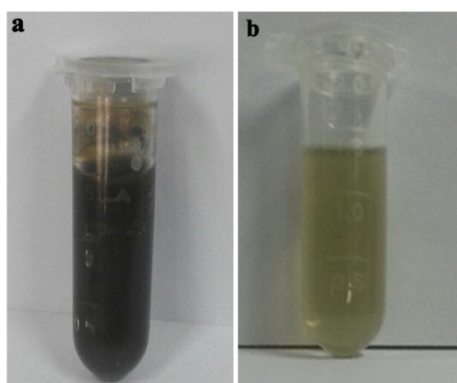

Figure S3 (a) the photo of ultrathin MoS<sub>2</sub> exfoliated by the liquid-phase exfoliation method in ethyl alcohol, (b) the supernatant of the centrifuge tube in (a) after centrifugation.
